# Supplementary material for: A nanoflower-like GaSe/β-Ga2O3 based heterostructure for highly efficient self-powered broadband photodetectors
Source: Royal Society of Chemistry journal article supplement (doi:10.1039/d3tc04337a), 2023-12-29
Supplement: d3tc04337a1.pdf [file d3tc04337a1.pdf]

## Supporting Information

### Nanoflowers like GaSe/ $\beta$ -Ga<sub>2</sub>O<sub>3</sub> based heterostructure for highly efficient self-powered broadband photodetector

Urvashi Varshney<sup>1,2</sup>, Anuj Sharma<sup>1,2</sup>, Aditya Yadav<sup>1,2</sup>, Preeti Goswami<sup>1,2</sup> and Govind Gupta<sup>1,2\*</sup>

<sup>1</sup> Academy of Scientific & Innovative Research (AcSIR), Ghaziabad-201002, India.

<sup>2</sup> CSIR-National Physical Laboratory, Dr. K.S. Krishnan Marg, New Delhi, 110012, India.

\*Corresponding Author Email: [govind@nplindia.org](mailto:govind@nplindia.org), [govindnpl@gmail.com](mailto:govindnpl@gmail.com)

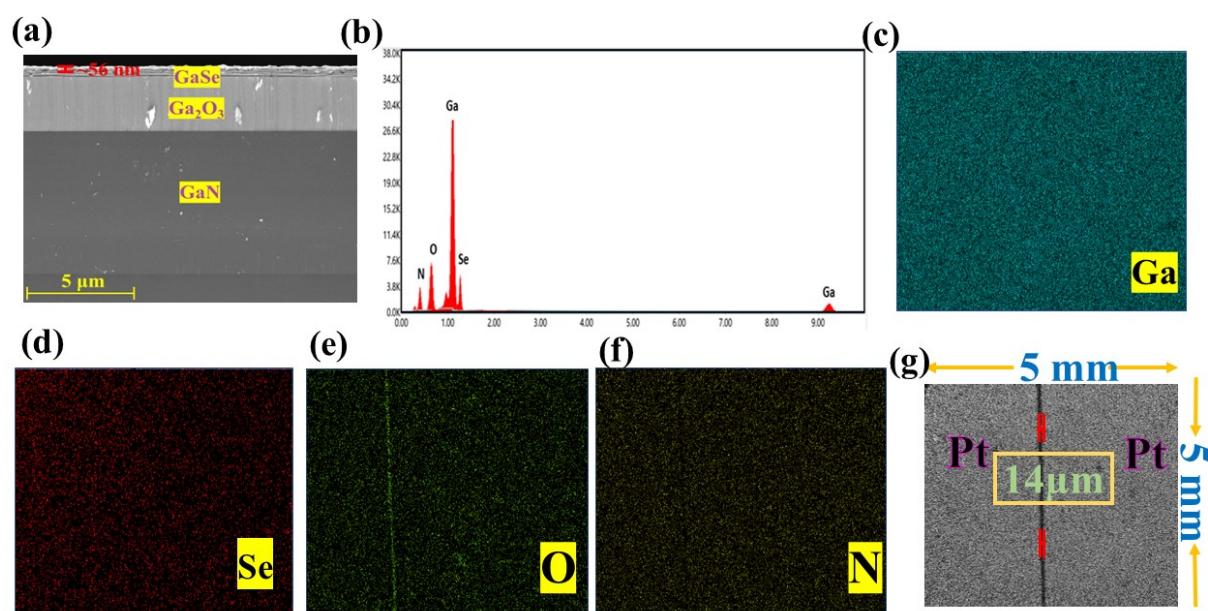

Figure S-1: (a) Cross-sectional FESEM image, (b) EDAX spectra, with individual elemental mapping of (c) Ga, (d) Se, (e) O and (f) N, and (g) top-view image of the GaSe/ $\beta$ -Ga<sub>2</sub>O<sub>3</sub>/GaN heterostructure.

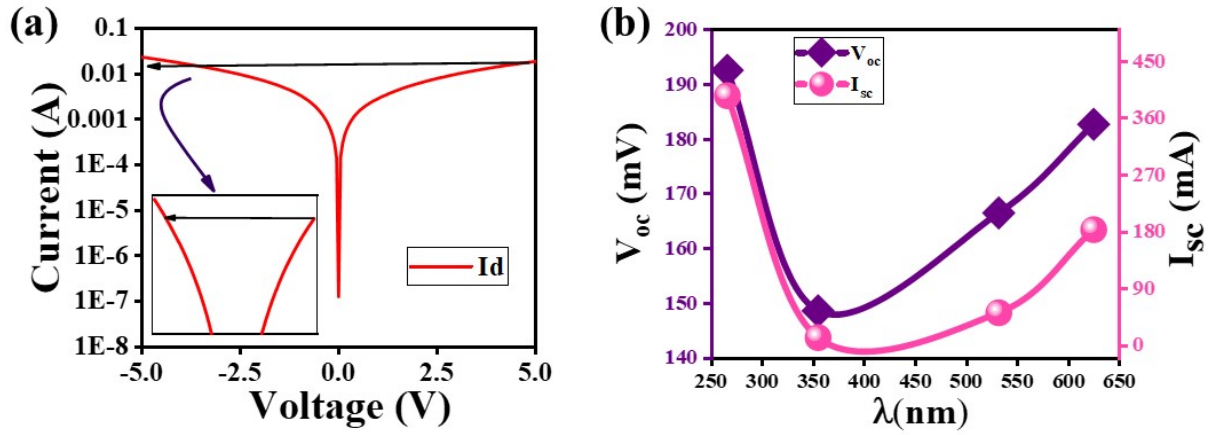

Figure S-2: (a)  $I$ - $V$  semilog plots of the developed device, and the inset shows an enlarged display at 5 V and (b)  $V_{oc}$  ( $I_{sc}$ ) values at 0V bias for illumination wavelength.

The values of open circuit voltage ( $V_{oc}$ ), short circuit current ( $I_{sc}$ ), responsivity ( $R$ ), external quantum efficiency (EQE), detectivity ( $D$ ), linear dynamic range (LDR), and power law are determined using the following equations.

$$V_{oc} = \frac{K_B T}{e} \ln \left( \frac{I_l}{I_d} - 1 \right) \quad (1)$$

$$I_{sc} = (I_l - I_d) \left[ \left( \exp \frac{eV_{oc}}{K_B T} \right) - 1 \right] \quad (2)$$

$$R = \frac{I_{light} - I_{dark}}{P_d A} = \frac{I_p}{P} \quad (3)$$

$$E.Q.E. = \frac{R \cdot h\nu}{e} \quad (4)$$

$$NEP = \frac{\{2eId\}^{1/2}}{R} \quad (5)$$

$$D = \frac{(R\sqrt{A})}{\sqrt{2eI}}$$

$$\frac{K_B T}{e}$$

where  $K_B$  is the Boltzmann constant,  $\frac{K_B T}{e}$  is the thermal voltage, 25.69 mV at room temperature,  $I_{\text{light}}$  is the photocurrent under illumination,  $I_{\text{dark}}$  is the dark current,  $P_d$  is power density,  $P$  is incident optical power intensity,  $A$  is the effective illumination area of the device,  $e$  is the charge of an electron,  $I_p$  is the photocurrent,  $P_{\text{max}}$  and  $P_{\text{min}}$  represents the optical power maximum and minimum in a particular range of the device,  $h$  is the Planks constant, and  $\alpha$  determines the photocurrent response w.r.t. optical power density.

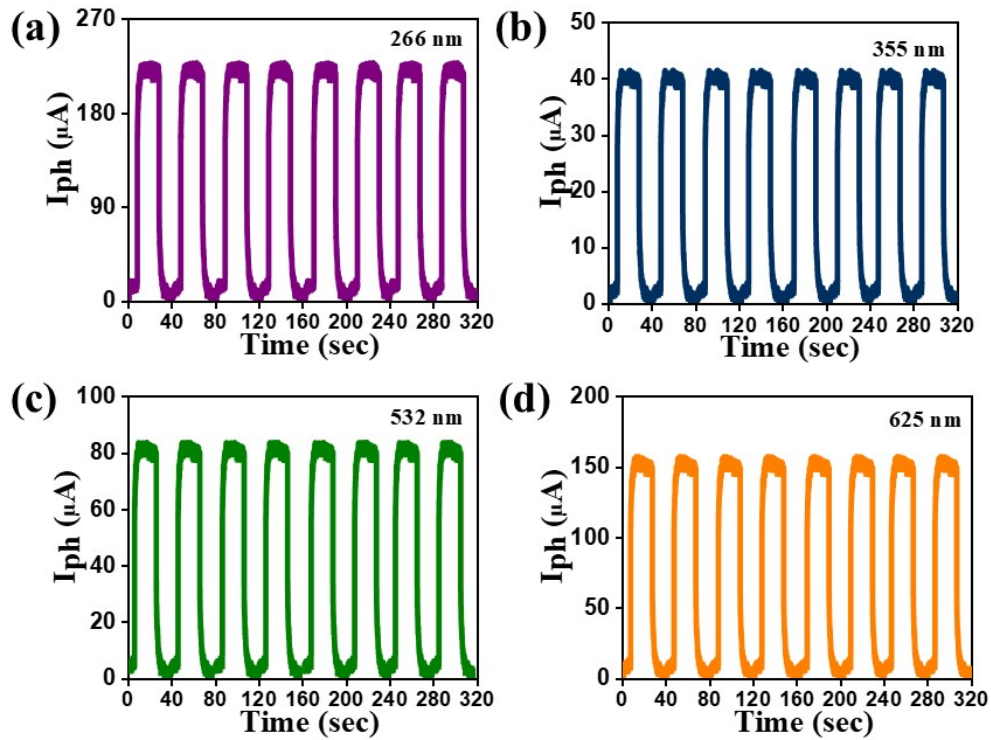

Figure S-3: Consistent, repeatable on/off multi-cycle at 0 V applied bias for all wavelengths, (a) 266 nm, (b) 355 nm, (c) 532 nm, and (d) 625 nm light illumination.

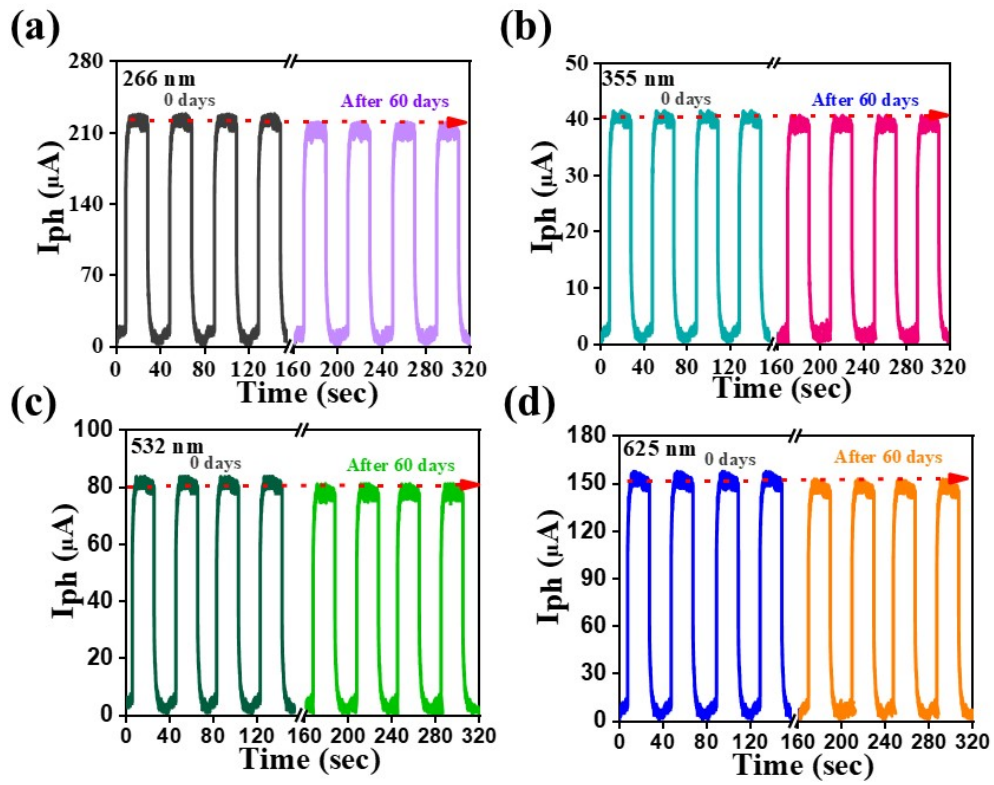

Figure S-4: The device performs at (a) 266 nm, (b) 355 nm, (c) 532 nm, and (d) 625 nm wavelengths after two months, demonstrating outstanding stability.

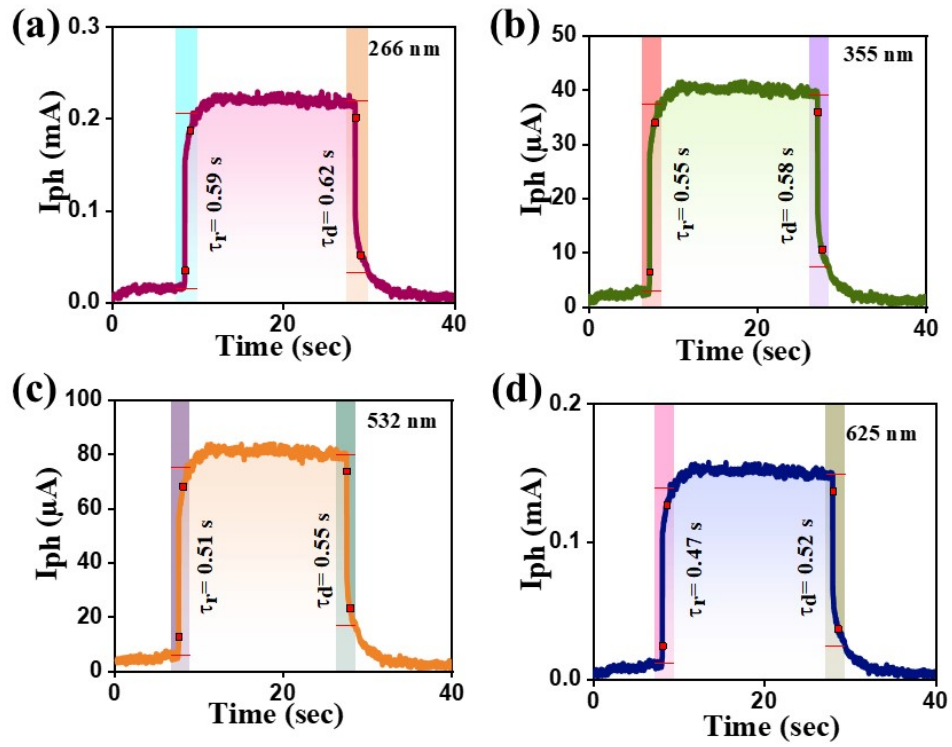

Figure S-5: The photoresponse curve to calculate the rise time and decay time (a) 266 nm, (b) 355 nm, (c) 532 nm, and (d) 625 nm.

Table S1: The bias-dependent performance parameters of the Ga<sub>2</sub>O<sub>3</sub>/GaN-NSS photodetection device for all wavelengths.

| Wavelength (nm) | Bias (V) | R (AW <sup>-1</sup> ) | D (×10 <sup>9</sup> Jones) | EQE (×10 <sup>3</sup> %) | NEP (×10 <sup>-12</sup> WHz <sup>-1/2</sup> ) |
|-----------------|----------|-----------------------|----------------------------|--------------------------|-----------------------------------------------|
| 266 nm          | 0.5      | 5.48                  | 3.31                       | 2.56                     | 3.91                                          |
|                 | 1        | 10.67                 | 4.62                       | 4.98                     | 2.80                                          |
|                 | 3        | 37.40                 | 8.67                       | 17.47                    | 1.49                                          |
|                 | 5        | 71.06                 | 11.94                      | 33.19                    | 1.08                                          |
| 355 nm          | 0.5      | 1.43                  | 0.83                       | 0.50                     | 14.94                                         |
|                 | 1        | 2.69                  | 1.12                       | 0.94                     | 11.11                                         |
|                 | 3        | 9.51                  | 2.13                       | 3.32                     | 5.87                                          |
|                 | 5        | 18.04                 | 2.92                       | 6.31                     | 4.27                                          |
| 532 nm          | 0.5      | 2.29                  | 1.44                       | 0.53                     | 9.36                                          |
|                 | 1        | 4.37                  | 1.97                       | 1.02                     | 6.84                                          |
|                 | 3        | 15.52                 | 3.74                       | 3.62                     | 3.60                                          |
|                 | 5        | 29.37                 | 5.14                       | 6.86                     | 2.62                                          |
| 625 nm          | 0.5      | 5.01                  | 3.14                       | 1.75                     | 4.29                                          |
|                 | 1        | 9.79                  | 4.41                       | 3.42                     | 3.05                                          |
|                 | 3        | 34.17                 | 8.24                       | 11.95                    | 1.63                                          |
|                 | 5        | 64.80                 | 11.33                      | 22.67                    | 1.18                                          |

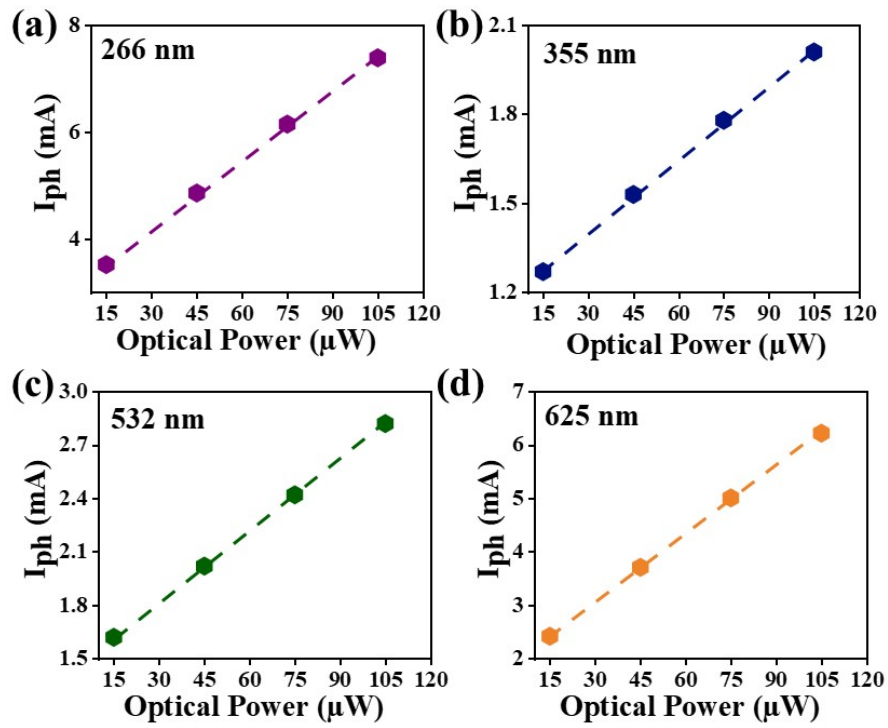

Figure S-6: Power-law curves for the developed device under the light illumination (a) 266 nm, (b) 355 nm, (c) 532 nm & (d) 625 nm.
